# Supplementary material
Source: MDPI journal article supplement (https://www.mdpi.com/2571-6255/6/3/122)
Supplement: s1 [file s1]

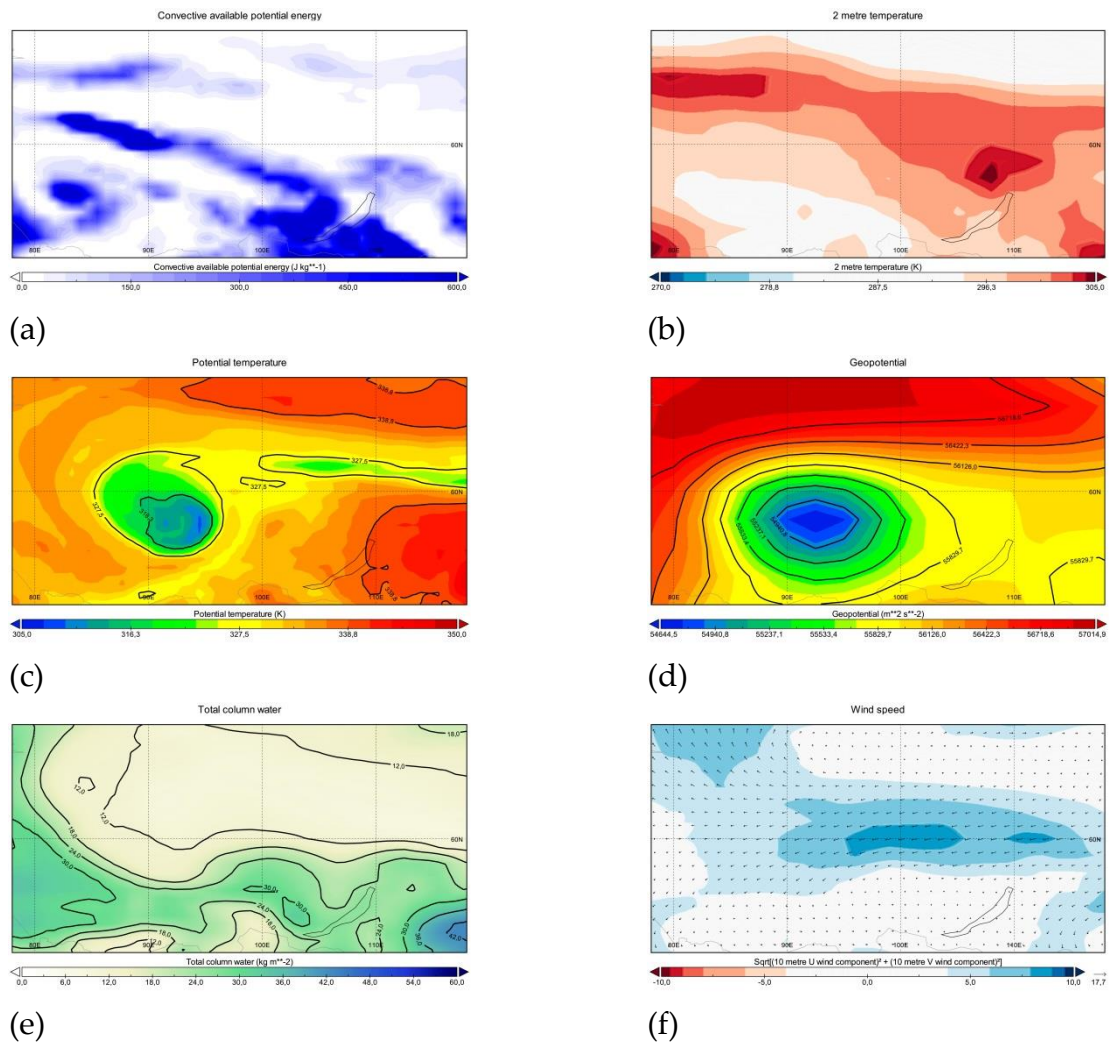

Figure S2.

17 July 12 UTC **(a)** - Convective amiable potential energy (CAPE), **(b)** - surface temperature

20 July 12 UTC **(c)** - PV- $\theta$ , **(d)** - geopotential height at 500 hPa, **(e)** - total column water, **(f)** - wind at 10 m.
