# Supplementary material
Source: MDPI journal article supplement (https://www.mdpi.com/2571-6255/6/3/122)
Supplement: s1 [file s1]

**Table S1.** The time table of high precipitation, forest fires clusters formation, RWB and blocks

|   | Precipitation                                         | Forest fires                                                                                                           | RWB (60°E-120°E) |                  | Blocks (80°E-120°E) |  |
|---|-------------------------------------------------------|------------------------------------------------------------------------------------------------------------------------|------------------|------------------|---------------------|--|
|   |                                                       |                                                                                                                        | AWB              | CWB              |                     |  |
| 1 |                                                       |                                                                                                                        |                  | 15/06 (110°E)    |                     |  |
| 2 | 24-26 June:<br>1 <sup>st</sup><br>peak of<br>rainfall |                                                                                                                        |                  | 24-26/06 (110°E) |                     |  |
| 3 |                                                       |                                                                                                                        |                  | 28-29/06 (75°E)  |                     |  |
|   |                                                       |                                                                                                                        |                  | 1-2/07 (75°E)    |                     |  |
|   |                                                       | 3-15 July: detection of the<br>1 <sup>st</sup> area of forest fire<br>cluster (fig. 2)                                 |                  |                  |                     |  |
| 4 |                                                       | 14-16/07 (75E)                                                                                                         | 15-17/07 (110°E) | 12-21 July       |                     |  |
| 5 |                                                       | 16-31 July:<br><br>2 <sup>nd</sup> and 3 <sup>rd</sup> area of forest<br>fire clusters, maximal<br>intensity           |                  | 23/07 (110°E)    |                     |  |
|   |                                                       |                                                                                                                        |                  | 25-28/07 (110°E) |                     |  |
| 6 |                                                       | 1-12 August, 2 <sup>nd</sup> peak of<br>intensification of 2 <sup>nd</sup> and<br>3 <sup>rd</sup> forest fire clusters | 2/08 (75°E)      |                  | 4-10 August         |  |
|   |                                                       |                                                                                                                        | 7/08 (75°E)      |                  |                     |  |
|   |                                                       |                                                                                                                        |                  |                  |                     |  |
