# Supplementary material
Source: MDPI journal article supplement (https://www.mdpi.com/2571-6255/6/3/122)

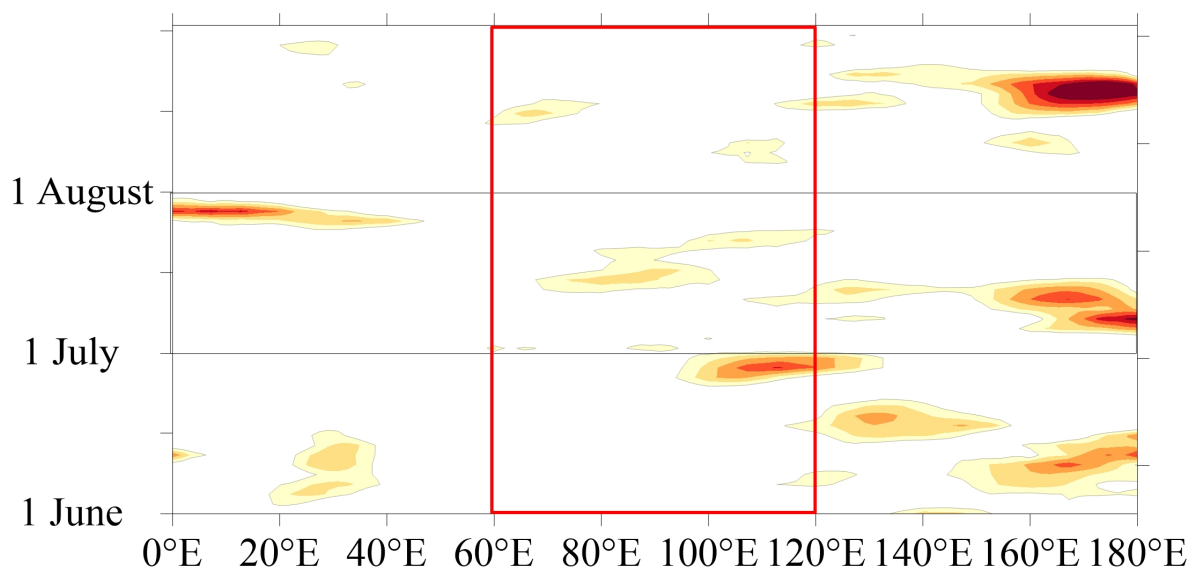

**Figure S1.** The longitude time cross-section of the GHGS blocking index for summer 2019.

Supplement: s1 [file s1]
